# Supplementary material
Source: PubMed Central journal article supplement (PMC4215945)
Supplement: NIHMS635820-supplement-Supplementary_data.pdf [file NIHMS635820-supplement-Supplementary_data.pdf]

## Supplemental section

### Novel 3,5-bis(arylidene)-4-oxo-1-piperidinyl dimers: structure-activity relationships and potent antileukemic and antilymphoma cytotoxicity

Yahaira Santiago-Vazquez<sup>a</sup>, Swagatika Das<sup>b</sup>, Umashankar Das<sup>b,\*</sup>, Elisa Robles-Escajeda<sup>a</sup>, Nora M. Ortega<sup>a</sup>, Carolina Lema<sup>a</sup>, Armando Varela-Ramírez<sup>a</sup>, Renato J. Aguilera<sup>a,\*</sup>, Jan Balzarini<sup>c</sup>, Erik De Clercq<sup>c</sup>, Stephen G. Dimmock<sup>d</sup>, Dennis K.J. Gorecki<sup>a</sup>, Jonathan R. Dimmock<sup>a</sup>

<sup>a</sup> *Cytometry, Screening and Imaging Facility, Border Biomedical Research Center and Department of Biological Sciences, University of Texas at El Paso, El Paso, Texas 79968-0519, USA*

<sup>b</sup> *Drug Discovery and Development Research Group, College of Pharmacy and Nutrition, University of Saskatchewan, Saskatoon, Saskatchewan S7N 5C9, Canada*

<sup>c</sup> *Rega Institute for Medical Research, KU Leuven, B-3000 Leuven, Belgium*

<sup>d</sup> *Department of Finance, Nanyang Technological University, Singapore 639798, Singapore*

## Characterization of 3,5-bis(arylidene)-4-piperidone dimers (3a-i, 4a-i and 5)

Melting points were determined on a Gallenkamp instrument and are uncorrected. <sup>1</sup>H and <sup>13</sup>C NMR were recorded using a Bruker Avance 500 MHz spectrometer equipped with a 5mm BBO probe. Chemical shifts (δ) are reported in ppm. Elemental analyses were undertaken using an Elementer CHNS analyzer. The <sup>1</sup>H and <sup>13</sup>C NMR spectra of three representative compounds (one from each series) namely **3e**, **4e** and **5** are presented.

### *1,2-bis[3,5-bis(Benzylidene)-4-oxo-piperidin-1-yl]ethane-1,2-dione (3a)<sup>1</sup>*

Yield: 62%; mp (chloroform/methanol) 246 °C; <sup>1</sup>H NMR(500 MHz, DMSO-d<sub>6</sub>): δ 7.72(s, 2H, 2×=CH), 7.56 (s, 2H, 2×=CH), 7.53(t, 4H, Ar-H), 7.49(d, J=7.07 Hz, 2H, Ar-H), 7.45(m, 6H, Ar-H), 7.39(m, 8H, Ar-H), 4.48(d, J=23.28Hz, 8H, 4×NCH<sub>2</sub>); <sup>13</sup>C NMR (125MHz, DMSO-d<sub>6</sub>):184.7, 162.6, 137.9, 137.5, 134.4, 134.1, 131.4, 131.0, 130.9, 130.7, 130.2, 130.1, 129.3, 129.2, 46.4, 41.6.; MS (ESI) m/z: 627 (M+Na)<sup>+</sup>. Anal.calcd for C<sub>40</sub>H<sub>32</sub>N<sub>2</sub>O<sub>4</sub>.H<sub>2</sub>O: C 77.17; H 5.14; N 4.50, found: C 77.05; H 4.87; N 4.42.

### *1,2-bis[3,5-bis(4-Fluorobenzylidene)-4-oxo-piperidin-1-yl]ethane-1,2-dione (3b)<sup>2</sup>*

Yield: 67%; mp (chloroform/methanol) 253 °C; <sup>1</sup>H NMR (500 MHz, CDCl<sub>3</sub>): δ 7.73(s, 2H, 2×=CH), 7.57 (s, 2H, 2×=CH), 7.37(q, 4H, Ar-H), 7.25 (q, 4H, Ar-H), 7.18 (t, 4H, Ar-H), 7.098(t, 4H, Ar-H), 4.63 (s, 4H, 2×NCH<sub>2</sub>), 4.51 (s, 4H, 2×NCH<sub>2</sub>). Anal.calcd for C<sub>41</sub>H<sub>26</sub>Cl<sub>8</sub>N<sub>2</sub>O<sub>4</sub>.H<sub>2</sub>O: C 53.93; H 3.09; N 3.07 %, found: C 53.84; H 2.98; N 2.74%.

### *1,2-bis[3,5-bis(4-Chlorobenzylidene)-4-oxo-piperidin-1-yl]ethane-1,2-dione (3c)<sup>2</sup>*

Yield: 61%; mp (methanol) 289 °C; <sup>1</sup>H NMR (500 MHz, CDCl<sub>3</sub>): δ 7.72(s, 2H, 2×=CH), 7.54 (s, 2H, 2×=CH), 7.46 (d, J=8.40 Hz, 2H, Ar-H), 7.37(d, J=8.37 Hz, 2H, Ar-H ), 7.31(d, J=8.42 Hz, 4H, Ar-H), 7.20(d, J=8.38 Hz, 4H, Ar-H), 4.62 (s, 4H, 2×NCH<sub>2</sub>), 4.52 (s, 4H, 2×NCH<sub>2</sub>). Anal.calcd for C<sub>40</sub>H<sub>28</sub>Cl<sub>4</sub>N<sub>2</sub>O<sub>4</sub>.3 H<sub>2</sub>O: C 60.26; H 3.54; N 3.51 %, found: C 60.35; H 3.70; N 3.15%.

### *1,2-bis[3,5-bis(3,4-Dichlorobenzylidene)-4-oxo-piperidin-1-yl]ethane-1,2-dione (3d)<sup>2</sup>*

Yield: 64%; mp (chloroform/methanol) 271 °C; <sup>1</sup>H NMR (500 MHz, CDCl<sub>3</sub>): δ 7.68 (s, 2H, 2×=CH), 7.55 (s, 1H, =CH), 7.53 (s, 1H, =CH), 7.46 (d, J=8.15 Hz, 6H, Ar-H), 7.41(d, J=1.71

Hz, 2H, Ar-H), 7.20 (dd, J=1.67Hz, J=1.71Hz, 2H, Ar-H), 7.05 (dd, J=1.71 Hz, J=1.77 Hz, 2H, Ar-H), 4.67 (s, 4H, 2xNCH<sub>2</sub>), 4.56 (s, 4H, 2xNCH<sub>2</sub>). Anal.calcd for C<sub>40</sub>H<sub>24</sub>Cl<sub>8</sub>N<sub>2</sub>O<sub>4</sub>: C 54.58; H 2.75; N 3.18 %, found: C 54.52; H 2.90; N 2.95 %.

*1,2-bis[3,5-bis(4-Methylbenzylidene)-4-oxo-piperidin-1-yl]ethane-1,2-dione (3e)<sup>2</sup>*

Yield: 53%; mp (chloroform/methanol) 275 °C; <sup>1</sup>H NMR (500 MHz, CDCl<sub>3</sub>): δ 7.79(s, 2H, 2x=CH), 7.65 (s, 2H, 2x=CH), 7.29 (d, J=7.70 Hz, 8H, Ar-H), 7.18(q, 8H, Ar-H), 4.53 (d, J=15.61 Hz, 8H, 4xNCH<sub>2</sub>), 2.44 (s, 6H, 2xCH<sub>3</sub>), 2.28 (s, 6H, 2xCH<sub>3</sub>). <sup>13</sup>C NMR (125 MHz, CDCl<sub>3</sub>): δ 185.04(C=O), 162.73(C=O), 140.31(C=C-Ph), 140.22(C=C-Ph), 139.15(C=C-Ph), 138.29(C=C-Ph), 131.57(Ar-C), 131.07(Ar-C), 130.67(Ar-C), 130.33(Ar-C), 129.72(Ar-C), 129.62(Ar-C), 129.46(Ar-C), 129.00(Ar-C), 46.07(CH<sub>2</sub>NCO), 42.05(CH<sub>2</sub>NCO), 21.53(CH<sub>3</sub>), 21.43(CH<sub>3</sub>). Anal.calcd for C<sub>44</sub>H<sub>40</sub>N<sub>2</sub>O<sub>4</sub>.1.5 H<sub>2</sub>O: C 76.76; H 6.30; N 4.07 %, found: C 76.46; H 6.39; N 3.93%.

*1,2-bis[3,5-bis(3,4-Dimethoxybenzylidene)-4-oxo-piperidin-1-yl]ethane-1,2-dione (3f)<sup>2</sup>*

Yield: 60%; mp (chloroform/methanol) 282 °C; <sup>1</sup>H NMR (500 MHz, CDCl<sub>3</sub>): δ 7.71(s, 2H, 2x=CH), 7.42 (s, 2H, 2x=CH), 6.99 (d, J=8.47 Hz, 4H, Ar-H), 6.94(d, J=8.08 Hz, 2H, Ar-H), 6.80(m, 6H, Ar-H), 4.70 (s, 4H, 2xNCH<sub>2</sub>), 4.64 (s, 4H, 2xNCH<sub>2</sub>), 4.00 (s, 6H, 2xOCH<sub>3</sub>), 3.96 (d, 12H, 4xOCH<sub>3</sub>), 3.74 (s, 6H, 2xOCH<sub>3</sub>). Anal.calcd for C<sub>48</sub>H<sub>48</sub>N<sub>2</sub>O<sub>12</sub>.H<sub>2</sub>O: C 66.75; H 5.84; N 3.24 %, found: C 66.31; H 5.62; N 3.06%.

*1,2-bis[3,5-bis(3,4,5-Trimethoxybenzylidene)-4-oxo-piperidin-1-yl]ethane-1,2-dione (3g)<sup>2</sup>*

Yield: 57%; mp (ethanol) 273 °C; <sup>1</sup>H NMR (500 MHz, CDCl<sub>3</sub>): δ 7.63(s, 2H, 2x=CH), 7.44 (s, 2H, 2x=CH), 6.66 (s, 4H, Ar-H), 6.49 (s, 4H, Ar-H), 4.75 (s, 4H, 4xNCH<sub>2</sub>), 4.68 (s, 4H, 4xNCH<sub>2</sub>), 3.96 (s, 12H, 4xOCH<sub>3</sub>), 3.94 (s, 9H, 3xOCH<sub>3</sub>), 3.88 (s, 9H, 3xOCH<sub>3</sub>), 3.84 (s, 6H, 2xOCH<sub>3</sub>). Anal.calcd for C<sub>52</sub>H<sub>56</sub>N<sub>2</sub>O<sub>16</sub> : C 64.72; H 5.85; N 2.90 %, found: C 64.95; H 6.16; N 2.78%.

*1,2-bis[3,5-bis(4-Methoxybenzylidene)-4-oxo-piperidin-1-yl]ethane-1,2-dione (3h)<sup>2</sup>*

Yield: 71%; mp (chloroform/methanol) >300 °C; <sup>1</sup>H NMR (500 MHz, CDCl<sub>3</sub>): δ 7.74(s, 2H, 2x=CH), 7.58 (s, 2H, 2x=CH), 7.35 (d, J=8.65 Hz, 4H, Ar-H), 7.22 (d, J=8.63 Hz, 4H, Ar-H),

6.98 (d, J=8.71 Hz, 4H, Ar-H), 6.91 (d, J=8.67 Hz, 4H, Ar-H), 4.60 (s, 4H, 2×NCH<sub>2</sub>), 4.53 (s, 4H, 2×NCH<sub>2</sub>), 3.90 (s, 6H, 2×OCH<sub>3</sub>), 3.76 (s, 6H, 2×OCH<sub>3</sub>). Anal.calcd for C<sub>44</sub>H<sub>40</sub>N<sub>2</sub>O<sub>8</sub> : C 72.91; H 5.56; N 3.86 %, found: C 72.57; H 5.94; N 3.75%.

*1,2-bis[3,5-bis{4-(N,N-Dimethylamino)benzylidene}-4-oxo-piperidin-1-yl]ethane-1,2-dione (3i)<sup>2</sup>*

Yield: 46%; mp (chloroform/methanol) >300 °C; <sup>1</sup>H NMR (500 MHz, CDCl<sub>3</sub>): δ 7.75(s, 2H, 2×=CH), 7.65 (s, 2H, 2×=CH), 7.33 (d, J=8.75 Hz, 4H, Ar-H), 7.21(d, J=8.71 Hz, 4H, Ar-H), 6.73 (d, J=16.93 Hz, 8H, Ar-H), 4.58 (s, 4H, 2×NCH<sub>2</sub>), 4.54 (s, 4H, 2×NCH<sub>2</sub>), 3.08 (s, 12H, 4×NCH<sub>3</sub>), 2.95 (s, 12H, 4×NCH<sub>3</sub>). Anal.calcd for C<sub>44</sub>H<sub>40</sub>N<sub>2</sub>O<sub>4</sub>.1.5 H<sub>2</sub>O: C 76.76; H 6.30; N 4.07 %, found: C 76.46; H 6.39; N 3.93%.

*1,3-bis-[3,5-bis(Benzylidene)-4-oxo-piperidin-1yl]propane-1,3-dione (4a)<sup>1</sup>*

Yield: 65%; mp (acetone) 201 °C; <sup>1</sup>H NMR (500 MHz, DMSO-d<sub>6</sub>): δ 7.72(s, 2H, 2×=CH), 7.57(s, 2H, 2×=CH), 7.53(d, J=4.18Hz, 8H, Ar-H), 7.47 (m, 12H, Ar-H), 4.62(d, J=21.13Hz, 8H, 4×NCH<sub>2</sub>), 3.46(s, 2H, CH<sub>2</sub>); <sup>13</sup>C NMR (125MHz, DMSO-d<sub>6</sub>):186.3, 165.9,136.6, 136.5, 134.7, 134.5, 132.6, 132.5, 131.0, 130.9, 130.1, 130.0, 129.3, 129.2, 47.0, 42.4; MS (ESI) m/z: 641 (M+Na)<sup>+</sup>. Anal.calcd for C<sub>41</sub>H<sub>34</sub>N<sub>2</sub>O<sub>4</sub>.H<sub>2</sub>O: C 77.27; H 5.65; N 4.39, found: C 77.31; H 5.50; N 4.47.

*1,3-bis-[3,5-bis(4-Fluorobenzylidene)-4-oxo-piperidin-1yl]propane-1,3-dione (4b)<sup>2</sup>*

Yield: 56%; mp (chloroform/methanol) >300 °C; <sup>1</sup>H NMR (500 MHz, CDCl<sub>3</sub>): δ 7.81 (s, 2H, 2×=CH), 7.75 (s, 2H, 2×=CH), 7.49(q, 4H, Ar-H), 7.33 (q, 4H, Ar-H), 7.18 (t, 4H, Ar-H), 7.12 (t, 4H, Ar-H), 4.84 (s, 4H, 2×NCH<sub>2</sub>), 4.79 (s, 4H, 2×NCH<sub>2</sub>), 3.22 (s, 2H, CH<sub>2</sub>). Anal.calcd for C<sub>41</sub>H<sub>30</sub>F<sub>4</sub>N<sub>2</sub>O<sub>4</sub>.H<sub>2</sub>O: C 69.42; H 4.27; N 3.95 %, found: C 69.58; H 4.30; N 3.71%.

*1,3-bis-[3,5-bis(4-Chlorobenzylidene)-4-oxo-piperidin-1yl]propane-1,3-dione (4c)<sup>2</sup>*

Yield: 58%; mp (chloroform/methanol) 260 °C; <sup>1</sup>H NMR (500 MHz, DMSO-d<sub>6</sub>): δ 7.64 (s, 2H, 2×=CH), 7.60 (s, 2H, 2×=CH), 7.57 (d, J=11.46 Hz, 4H, Ar-H), 7.54 (d, J=7.60 Hz, 4H, Ar-H), 7.49 (q, 8H, Ar-H), 4.62 (d, 8H, J=10.15 Hz, 4×NCH<sub>2</sub>), 3.51 (s, 2H, CH<sub>2</sub>). Anal.calcd for C<sub>41</sub>H<sub>30</sub>Cl<sub>4</sub>N<sub>2</sub>O<sub>4</sub>.2.5 H<sub>2</sub>O: C 61.38; H 3.77; N 3.49 %, found: C 61.10; H 3.69; N 3.30%.

*1,3-bis-[3,5-bis(3,4-Dichlorobenzylidene)-4-oxo-piperidin-1yl]propane-1,3-dione (4d)<sup>2</sup>*

Yield: 65%; mp (chloroform/methanol) 236 °C; <sup>1</sup>H NMR (500 MHz, CDCl<sub>3</sub>): δ 7.71 (s, 2H, 2×=CH), 7.63 (s, 2H, 2×=CH), 7.56 (q, 8H, Ar-H), 7.51 (d, J=8.29 Hz, 2H, Ar-H), 7.30 (d, J=1.45 Hz, 2H, Ar-H), 7.31 (dd, J=1.45 Hz, J=1.53 Hz, Ar-H), 7.15 (dd, J=1.48 Hz, 2H, Ar-H), 4.78 (d, 8H, J=6.72 Hz, 4×NCH<sub>2</sub>), 3.30 (s, 2H, CH<sub>2</sub>). Anal.calcd for C<sub>41</sub>H<sub>26</sub>Cl<sub>8</sub>N<sub>2</sub>O<sub>4</sub>. H<sub>2</sub>O: C 53.93; H 3.09; N 3.07 %, found: C 53.84; H 2.98; N 2.74%.

*1,3-bis-[3,5-bis(4-Methylbenzylidene)-4-oxo-piperidin-1yl]propane-1,3-dione (4e)<sup>2</sup>*

Yield: 43%; mp (chloroform/methanol) 251 °C; <sup>1</sup>H NMR (500 MHz, CDCl<sub>3</sub>): δ 7.81 (s, 2H, 2×=CH), 7.74 (s, 2H, 2×=CH), 7.40 (d, J=7.90 Hz, 4H, Ar-H), 7.27 (d, J=7.60 Hz, 4H, Ar-H), 7.21(q, 8H, Ar-H), 4.89 (s, 4H, 2×NCH<sub>2</sub>), 4.65 (s, 4H, 2×NCH<sub>2</sub>), 3.15 (s, 2H, CH<sub>2</sub>), 2.43 (s, 6H, 2×CH<sub>3</sub>), 2.41(s, 6H, 2×CH<sub>3</sub>). <sup>13</sup>C NMR (125MHz, CDCl<sub>3</sub>): δ 186.39(C=O), 165.30(CON), 140.31(C=C-Ph), 140.17(C=C-Ph), 138.62(C=C-Ph), 137.34(C=C-Ph), 131.86(Ar-C), 131.39(Ar-C), 130.88(Ar-C), 130.53(Ar-C), 130.45(Ar-C), 130.39(Ar-C), 130.33(Ar-C), 129.68(Ar-C), 129.61(Ar-C), 128.77(Ar-C), 46.79(CH<sub>2</sub>NCO), 43.85(CH<sub>2</sub>NCO), 40.54 (COCH<sub>2</sub>CO), 21.53(CH<sub>3</sub>). Anal.calcd for C<sub>45</sub>H<sub>42</sub>N<sub>2</sub>O<sub>4</sub>.H<sub>2</sub>O: C 77.94; H 6.40; N 4.04 %, found: C 77.94; H 6.63; N 3.98%.

*1,3-bis-[3,5-bis(3,4-Dimethoxybenzylidene)-4-oxo-piperidin-1yl]propane-1,3-dione (4f)<sup>2</sup>*

Yield: 65 %; mp (chloroform/methanol) >300 °C; <sup>1</sup>H NMR (500 MHz, DMSO-d<sub>6</sub>): δ 7.86 (s, 4H, 4×=CH), 7.17 (s, 4H, Ar-H), 7.13 (s, 8H, Ar-H), 4.54 (s, 8H, 4×NCH<sub>2</sub>), 3.84 (d, J=7.27 Hz, 24H, 8×OCH<sub>3</sub>), 3.48 (s, 2H, CH<sub>2</sub>). Anal.calcd for C<sub>49</sub>H<sub>50</sub>N<sub>2</sub>O<sub>12.7</sub> H<sub>2</sub>O: C 59.69; H 6.54; N 2.84 %, found: C 59.82; H 6.18; N 2.71%.

*1,3-bis-[3,5-bis(3,4,5-Trimethoxybenzylidene)-4-oxo-piperidin-1yl]propane-1,3-dione (4g)<sup>2</sup>*

Yield: 53%; mp (chloroform/methanol) 115 °C; <sup>1</sup>H NMR (500 MHz, CDCl<sub>3</sub>): δ 7.78 (s, 2H, 2×=CH), 7.74 (s, 2H, 2×=CH), 6.72 (s, 4H, Ar-H), 6.58 (s, 4H, Ar-H), 4.96 (s, 4H, 2×NCH<sub>2</sub>), 4.90 (s, 4H, 2×NCH<sub>2</sub>), 3.92 (d, J=15.37 Hz, 30H, 10×OCH<sub>3</sub>), 3.86 (s, 6H, 2×OCH<sub>3</sub>), 3.37 (s, 2H, CH<sub>2</sub>). Anal.calcd for C<sub>53</sub>H<sub>58</sub>N<sub>2</sub>O<sub>16</sub>.H<sub>2</sub>O: C 63.83; H 6.07; N 2.81 %, found: C 63.84; H 6.27; N 2.51%.

*1,3-bis-[3,5-bis(4-Methoxybenzylidene)-4-oxo-piperidin-1yl]propane-1,3-dione (4h)<sup>2</sup>*

Yield: 61%; mp (chloroform/methanol) 245 °C; <sup>1</sup>H NMR (500 MHz, CDCl<sub>3</sub>): δ 7.80 (s, 2H, 2×=CH), 7.73 (s, 2H, 2×=CH), 7.48 (d, J=8.6 Hz, 4H, Ar-H), 7.29 (d, J=10.17 Hz, 2H, Ar-H), 6.98 (d, J=8.49 Hz, 4H, Ar-H), 4.85(s, 4H, 2×NCH<sub>2</sub>), 4.72 (s, 4H, 2×NCH<sub>2</sub>), 3.88 (d, J=7.72 Hz, 12H, 4×OCH<sub>3</sub>), 3.22 (s, 2H, CH<sub>2</sub>). Anal.calcd for C<sub>45</sub>H<sub>42</sub>N<sub>2</sub>O<sub>8</sub>·4 H<sub>2</sub>O: C 66.59; H 5.22; N 3.45 %, found: C 66.68; H 5.38; N 3.27%.

*1,3-bis-[3,5-bis(4-Hydroxybenzylidene)-4-oxo-piperidin-1yl]propane-1,3-dione (4i)*<sup>2</sup>

Yield: 56%; mp (chloroform/ethanol) >300 °C; <sup>1</sup>H NMR (500 MHz, DMSO-d<sub>6</sub>): δ 7.64 (s, 2H, 2×=CH), 7.60 (s, 2H, 2×=CH), 7.57 (d, J=11.46 Hz, 4H, Ar-H), 7.54 (d, J=7.60 Hz, 4H, Ar-H), 7.49 (q, 8H, Ar-H), 4.62 (d, 8H, J=10.15 Hz, 4×NCH<sub>2</sub>), 3.51 (s, 2H, CH<sub>2</sub>). Anal.calcd for C<sub>41</sub>H<sub>34</sub>N<sub>2</sub>O<sub>8</sub>·4.5 H<sub>2</sub>O: C 64.46; H 5.68; N 3.67 %, found: C 64.59; H 5.31; N 3.59%.

*1,3-bis-[3,5-bis(benzylidene)-4-oxo-piperidin-1yl]propane (5)*<sup>2</sup>

Yield: 63 %; mp (acetone) 135 °C; <sup>1</sup>H NMR (500 MHz, CDCl<sub>3</sub>): δ 7.81(s, 4H, 4×=CH), 7.39 (m, 20H, Ar-H), 3.78 (s, 8H, 4×NCH<sub>2</sub>), 2.54 (t, 4H, 2×CH<sub>2</sub>), 1.60 (p, 2H, CH<sub>2</sub>). <sup>13</sup>C NMR (125 MHz, CDCl<sub>3</sub>): δ 187.34 (C=O), 136.57 (C=C-Ph), 135.20 (C=C-Ph), 133.11 (C=C-Ph), 130.40 (Ar-C), 129.05 (Ar-C), 128.60(Ar-C), 55.38 (NCH<sub>2</sub>CH<sub>2</sub>), 54.97 (NCH<sub>2</sub>-piperidone), 25.91 (CH<sub>2</sub>). Anal.calcd for C<sub>41</sub>H<sub>38</sub>N<sub>2</sub>O<sub>2</sub>: C 83.36; H 6.48; N 4.74 %, found: C 83.74; H 6.79; N 5.05%.

### <sup>1</sup>H and <sup>13</sup>C NMR spectra for representative compounds from the series 3-5

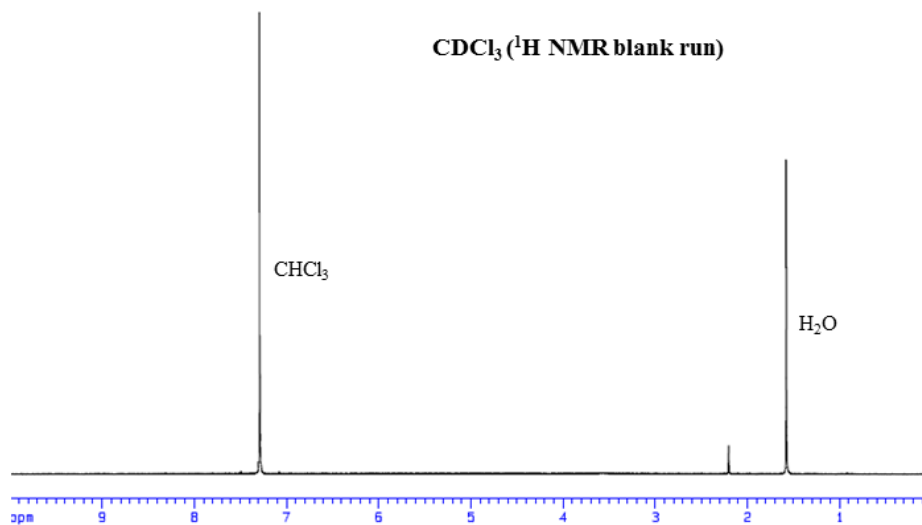

### <sup>1</sup>H NMR

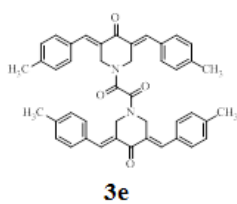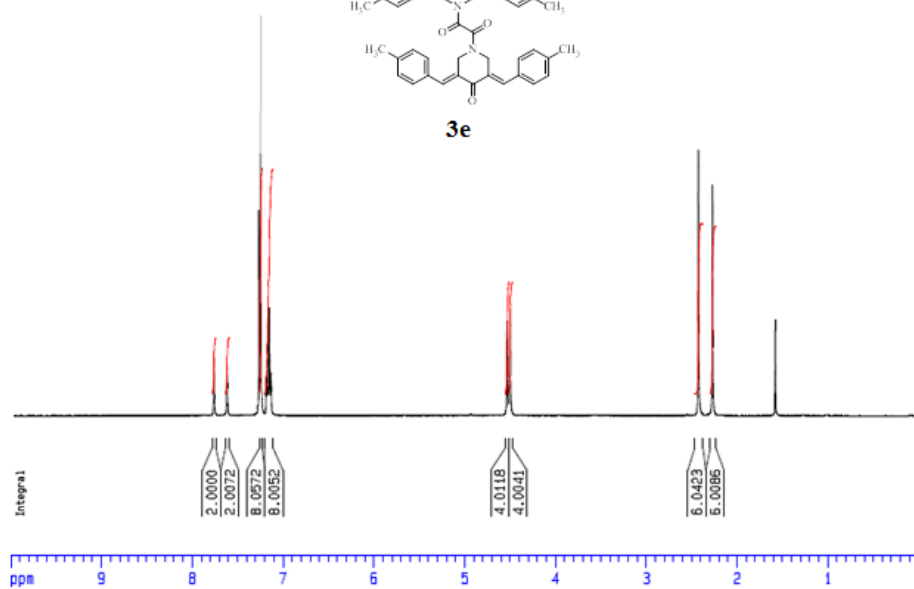

### <sup>13</sup>C NMR

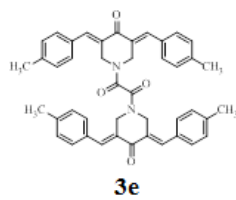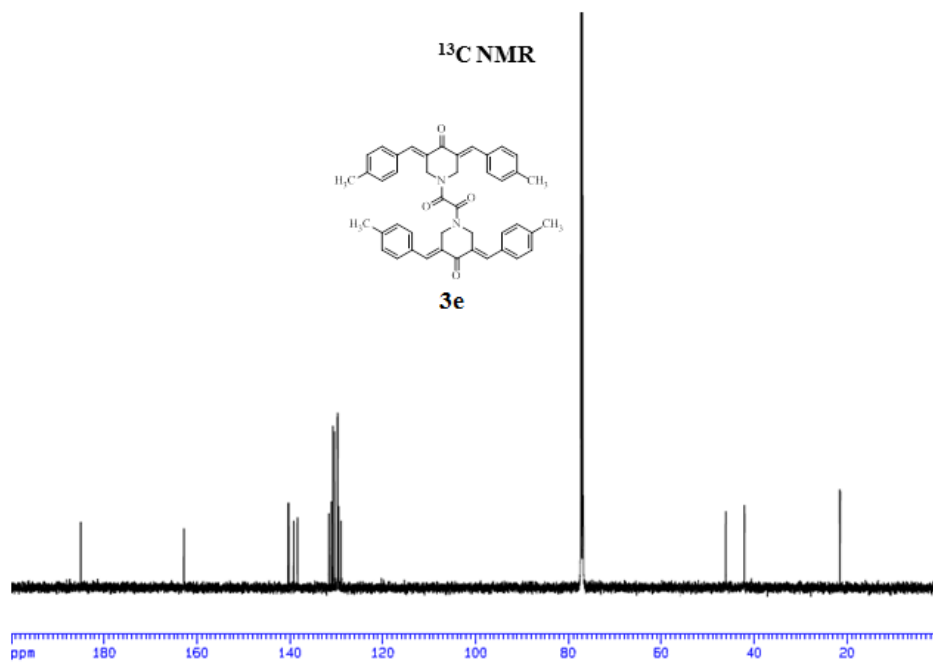





### <sup>1</sup>H NMR

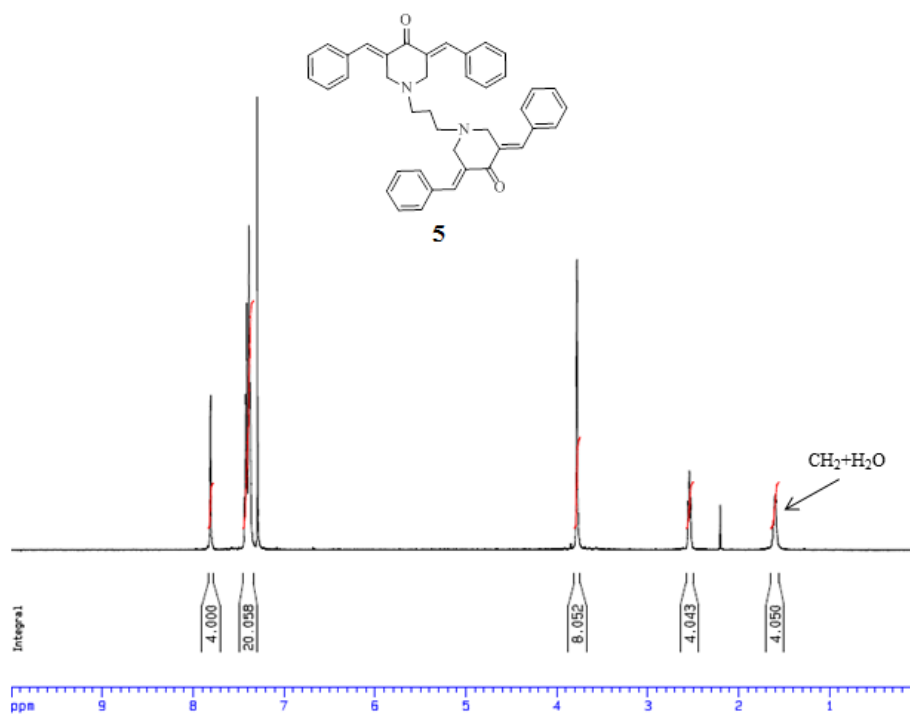

### <sup>13</sup>C NMR

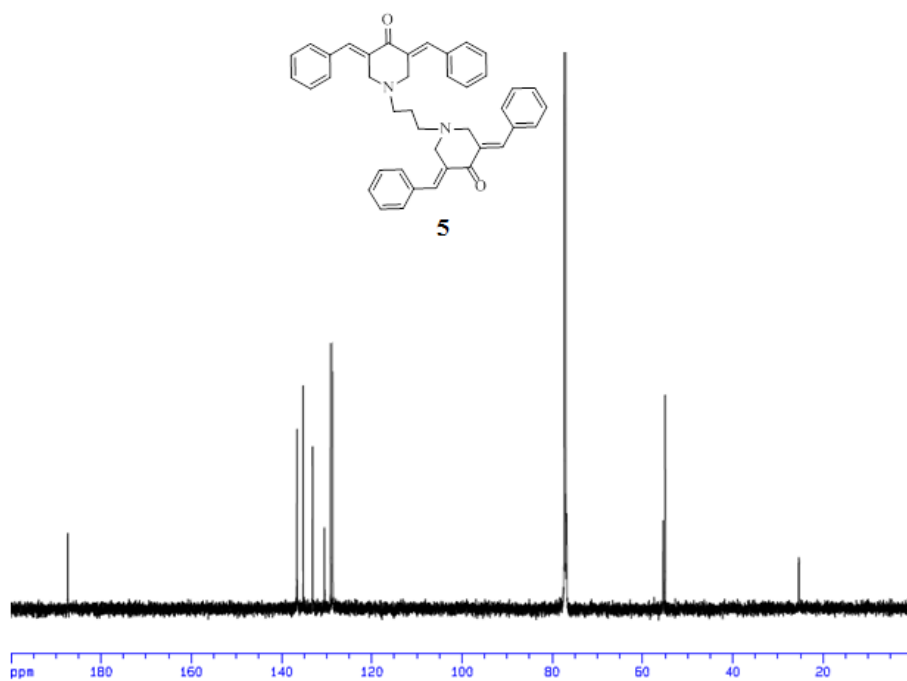

## Kendall's coefficient of concordance

The equation used to obtain the coefficient of concordance is derived as follows. In this case the cytotoxin  $i$  is given the rank  $r_{ij}$  where  $j$  is the cell line, and there are  $N$  cytotoxins and  $M$  cell lines. Thus the total rank  $R$  given to cytotoxin  $i$  is  $R_i = \sum_{j=1}^M r_{i,j}$ , and the mean value of these ranks is  $\bar{R} = \frac{1}{2}m(n + 1)$ .

The sum of the squared deviations, ( $S$ ), is defined as:  $\sum_i^N (R_i - \bar{R})^2$ .

Kendall's coefficient of concordance ( $W$ ) is:  $W = \frac{12S}{M^2(N^3 - N)}$  ... (1) If all the cell lines produce identical rankings, then  $W$  is 1. If there is no agreement, then  $W$  is 0.

When two or more compounds have the potencies (i.e., there are ties in the rankings), then equation 1 will understate the degree of concordance and must be adjusted. The correction factor ( $T_j$ ) is defined as  $T_j = \sum_{i=1}^{g_j} (t_i^3 - t_i)$ , in which  $t_i$  is the number of tied ranks in the  $i^{\text{th}}$  group of tied ranks (the number of cases of equal potency at a specific  $IC_{50}$  value) and  $g_j$  is the number of tie values. If there are no tied ranks for cell line  $j$  then this will be 0. Using this correction for ties, Kendall's coefficient of concordance as:  $W = \frac{12 \sum_{i=1}^N (R_i^2) - 3M^2 N(N+1)^2}{M^2 N(N^2 - 1) - M \sum_{j=1}^M (T_j)}$  ... (2)

**Table 1.** Evaluation of **3b,c,e-h**, **4b,c,e,f** and **5** against various lymphoma and leukemic cell lines<sup>a</sup>

| Compound  | % dead cells |      |       |         |        |      |        |      |       |      |      | Average |
|-----------|--------------|------|-------|---------|--------|------|--------|------|-------|------|------|---------|
|           | Jurkat       | CEM  | SUP-T | HUT-102 | Molt-3 | EL-4 | Nalm-6 | Raji | Ramos | BJAB | YT   |         |
| <b>3b</b> | 87.8         | 85.3 | 35.6  | 64.4    | 3.1    | 34.7 | 61.6   | 33.5 | 53.3  | 61.8 | 17.1 | 48.9    |
| <b>3c</b> | 78.5         | 59.9 | 18.1  | 31.4    | 0.4    | 52.5 | 59.0   | 35.7 | 82.9  | 43.1 | 21.5 | 43.9    |
| <b>3e</b> | 80.7         | 68.4 | 18.8  | 13.9    | 0.8    | 43.5 | 59.5   | 41.5 | 84.4  | 41.5 | 20.1 | 43.0    |
| <b>3f</b> | 84.8         | 88.1 | 33.0  | 50.9    | 31.8   | 46.5 | 60.7   | 56.3 | 87.4  | 62.8 | 39.2 | 58.3    |
| <b>3g</b> | 78.7         | 84.1 | 38.2  | 50.5    | 30.3   | 33.8 | 67.6   | 55.7 | 65.1  | 60.9 | 13.0 | 52.5    |
| <b>3h</b> | 72.0         | 71.9 | 15.2  | 6.7     | 49.6   | 71.7 | 62.6   | 69.1 | 53.7  | 45.8 | 5.8  | 47.7    |
| <b>4b</b> | 87.1         | 92.4 | 24.9  | 58.5    | 2.6    | 47.7 | 51.9   | 35.3 | 78.6  | 61.2 | 19.2 | 50.9    |
| <b>4c</b> | 85.3         | 83.0 | 21.1  | 20.4    | 20.6   | 55.4 | 68.6   | 32.7 | 86.3  | 49.9 | 16.8 | 49.1    |
| <b>4e</b> | 85.5         | 85.7 | 23.6  | 50.9    | 21.3   | 66.9 | 67.6   | 46.5 | 83.0  | 60.2 | 29.1 | 56.4    |
| <b>4f</b> | 83.9         | 77.6 | 31.0  | 51.6    | 2.6    | 43.7 | 63.9   | 50.8 | 88.6  | 61.0 | 32.3 | 53.4    |
| <b>5</b>  | 76.3         | 64.5 | 21.2  | 10.0    | 27.4   | 65.3 | 49.2   | 31.9 | 82.1  | 39.4 | 6.6  | 43.1    |
| Average   | 81.9         | 78.3 | 25.5  | 37.2    | 17.3   | 51.1 | 61.1   | 44.5 | 76.9  | 53.4 | 20.1 | 49.8    |

<sup>a</sup>A concentration of 1  $\mu$ M of each compound was incubated with different cell lines for 24 h at 37° C. The figures of the percentage of dead cells are the average of three independent experiments.

**Table 2.** Evaluation of **3b,c,e-h**, **4b,c,e,f** and **5** against some breast and prostate cancer cells and nonmalignant cells<sup>a</sup>

| Compound  | % dead cells |        |       |         |        |       |       |       |         |       |
|-----------|--------------|--------|-------|---------|--------|-------|-------|-------|---------|-------|
|           | MCF-7        | MDA231 | HCC70 | Average | MCF10A | DU145 | 22rv1 | LAPC4 | Average | Hs-27 |
| <b>3b</b> | 16.2         | 5.5    | 6.6   | 9.43    | 7.7    | 15.2  | 30.1  | 11.3  | 18.9    | 0.6   |
| <b>3c</b> | 17.8         | 10.0   | 8.4   | 12.1    | 2.2    | 33.1  | 13.6  | 27.0  | 24.6    | 0.0   |
| <b>3e</b> | 0.0          | 9.3    | 11.9  | 7.07    | 9.3    | 26.0  | 16.2  | 2.4   | 14.9    | 12.0  |
| <b>3f</b> | 17.7         | 4.6    | 3.9   | 8.73    | 5.8    | 45.7  | 38.2  | 35.4  | 39.8    | 10.2  |
| <b>3g</b> | 43.2         | 4.7    | 7.3   | 18.4    | 7.6    | 41.3  | 3.4   | 9.7   | 18.1    | 15.4  |
| <b>3h</b> | 16.2         | 0.6    | 14.7  | 10.5    | 9.9    | 11.4  | 0.0   | 1.9   | 4.43    | 0.6   |
| <b>4b</b> | 0.2          | 0.4    | 3.1   | 1.23    | 7.0    | 38.4  | 18.8  | 11.1  | 22.8    | 0.3   |
| <b>4c</b> | 19.5         | 32.7   | 7.8   | 20.0    | 3.1    | 40.3  | 1.7   | 1.0   | 14.3    | 5.7   |
| <b>4e</b> | 19.1         | 8.6    | 10.1  | 12.6    | 15.4   | 21.9  | 6.3   | 7.0   | 11.7    | 26.5  |
| <b>4f</b> | 23.0         | 1.8    | 2.1   | 8.97    | 6.1    | 67.4  | 2.0   | 20.6  | 30.0    | 6.4   |
| <b>5</b>  | 43.5         | 20.1   | 4.3   | 22.6    | 19.4   | 19.4  | 1.7   | 5.7   | 8.93    | 2.9   |
| Average   | 19.7         | 8.94   | 7.29  | 11.9    | 8.50   | 32.7  | 12.0  | 12.1  | 19.7    | 7.33  |

<sup>a</sup> A concentration of 1  $\mu$ M of each compound was incubated with different cell lines for 24 h at 37° C. The figures of the percentage of dead cells are the average of three independent experiments.

## References

1. S. Das, U. Das, A. Varela-Ramírez, C. Lema, R. J. Aguilera, J. Balzarini, E. De Clercq, S. G. Dimmock, D. K. J. Gorecki, J. R. Dimmock, ChemMedChem 6 (2011) 1892-1899.
2. S. Das, U. Das, D. Michel, D. K. J. Gorecki, J. R. Dimmock, Eur. J. Med. Chem. 64 (2013) 321-328.
